# Supplementary material for: Green, low-cost synthesis of photoluminescent carbon dots by hydrothermal treatment of willow bark and their application as an effective photocatalyst for fabricating Au nanoparticles–reduced graphene oxide nanocomposites for glucose detection
Source: Royal Society of Chemistry journal article supplement (doi:10.1039/c2cy20635h), 2012-12-12
Supplement: c2cy20635h.pdf [file c2cy20635h.pdf]

## Supporting Information

# Green, Low-Cost Synthesis of Photoluminescent Carbon Dots by Hydrothermal Treatment of Willow Bark and Their Application as An Effective Photocatalyst for Fabricating Au Nanoparticles/Reduced Graphene Oxide Nanocomposites for Glucose Detection

Xiaoyun Qin,<sup>a</sup> Wenbo Lu,<sup>a</sup> Abdullah M. Asiri,<sup>b,c</sup> Abdulrahman O. Al-Youbi,<sup>b,c</sup> and

Xuping Sun<sup>a,b,c,\*</sup>

<sup>a</sup> State Key Lab of Electroanalytical Chemistry, Changchun Institute of Applied Chemistry, Chinese Academy of Sciences, Changchun 130022, Jilin, P. R. China

<sup>b</sup> Chemistry Department, Faculty of Science, King Abdulaziz University, Jeddah 21589, Saudi Arabia

<sup>c</sup> Center of Excellence for Advanced Materials Research, King Abdulaziz University, Jeddah 21589, Saudi Arabia

\*Corresponding author. Tel/Fax: 0086-431-85262065. E-mail: sunxp@ciac.jl.cn (X. Sun).

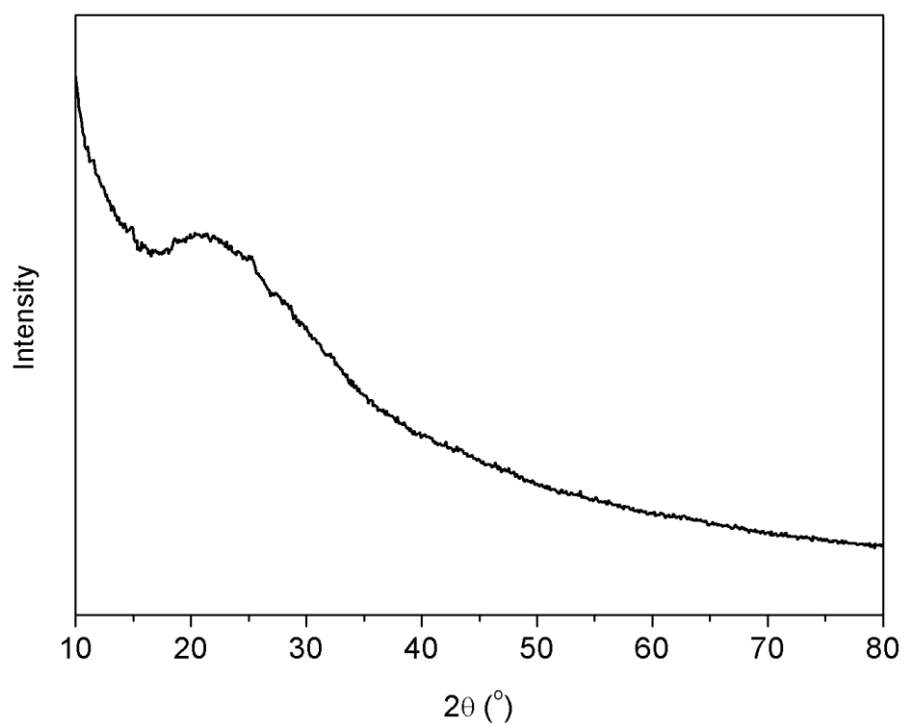

**Figure S1** The XRD pattern of the obtained CDs.

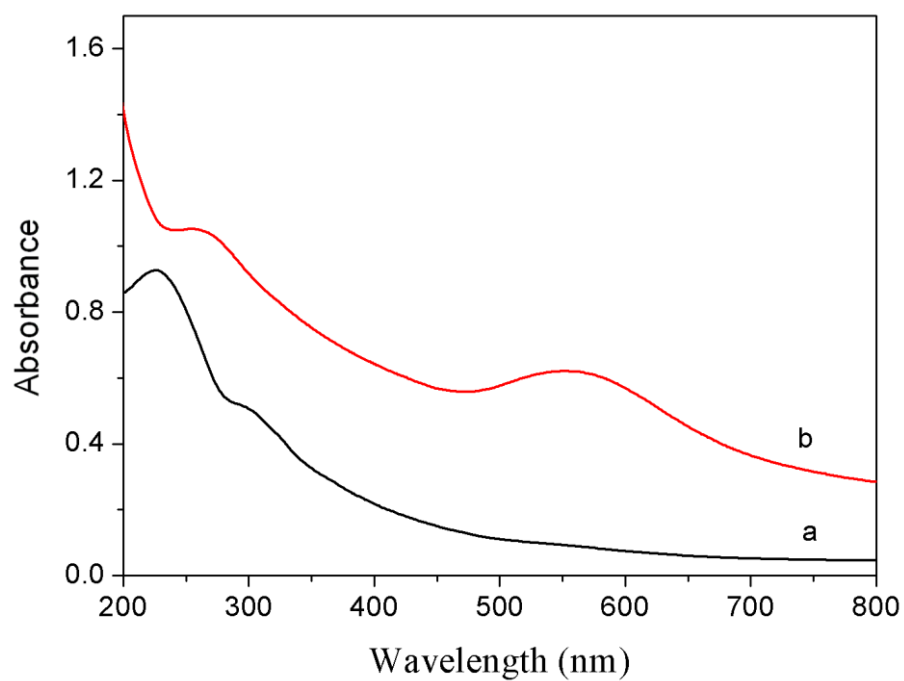

**Figure S2** UV-vis spectra of the mixture of GO and HAuCl<sub>4</sub> aqueous solution in the presence of CDs before (curve a) and after (curve b) UV irradiation.

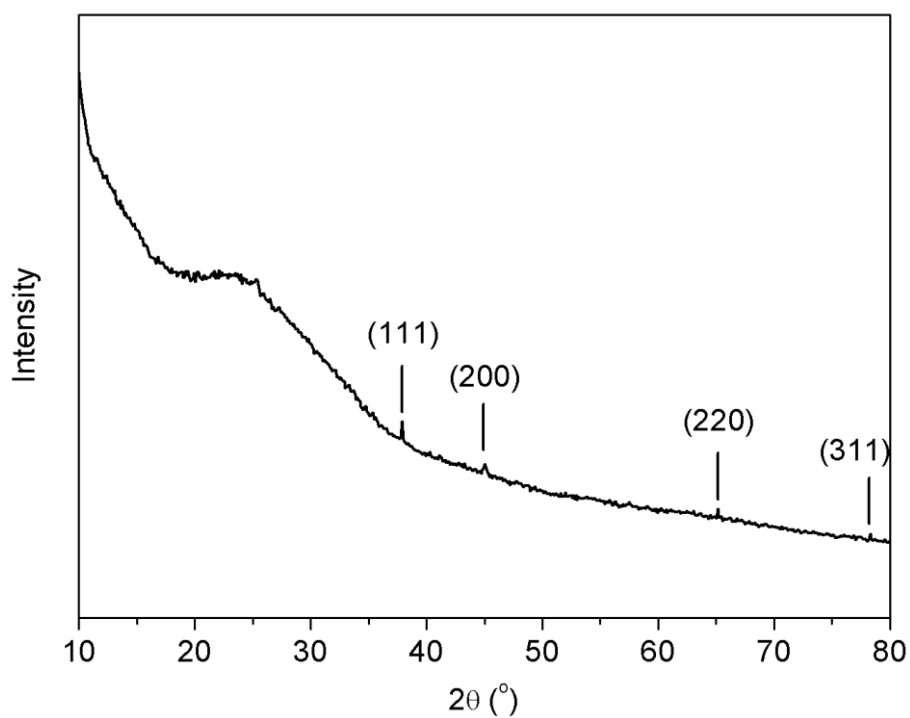

**Figure S3** The XRD pattern of the mixture of GO and HAuCl<sub>4</sub> aqueous solution in the presence of CDs after UV irradiation.

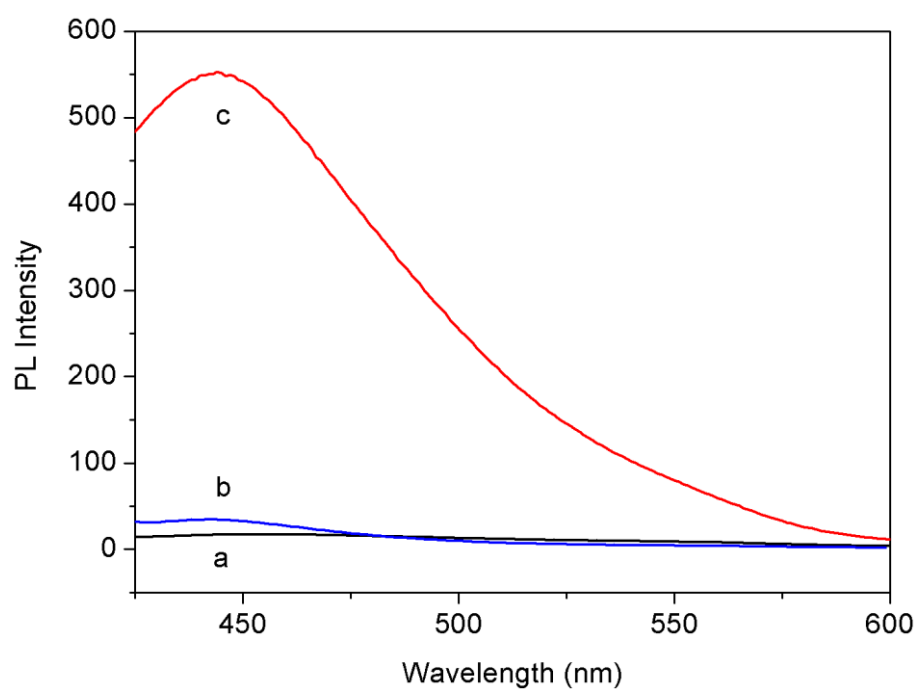

**Figure S4** PL emission spectra of aqueous dispersion of GO (curve a), CDs-GO (curve b) and CDs (curve c) (excitation at 360 nm).

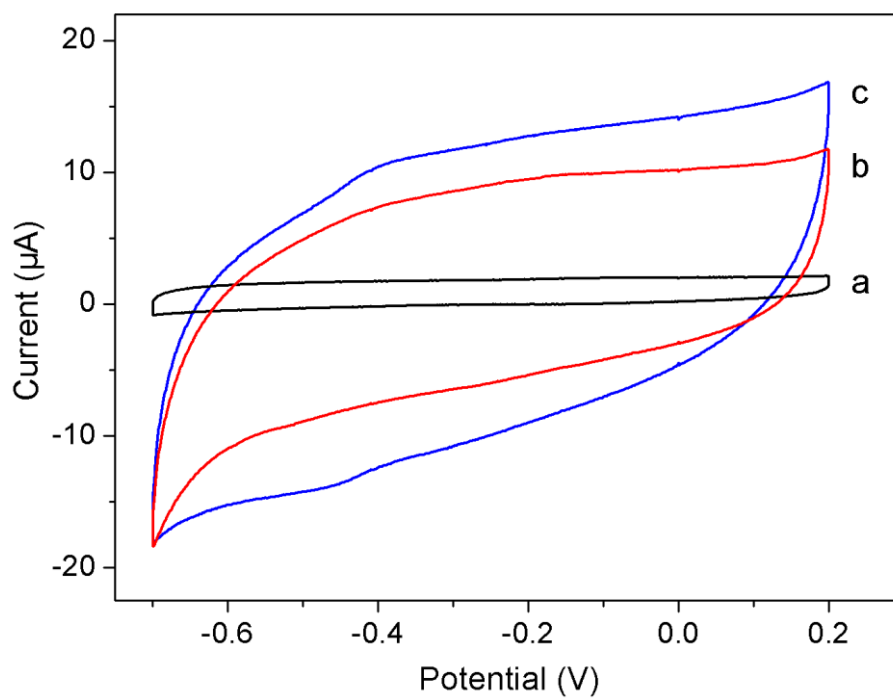

**Figure S5** CVs of bare GCE (curve a), AuNPs/rGO/GCE (curve b) and GOx/AuNPs/rGO/GCE (curve c) in N<sub>2</sub> saturated 0.2 M PBS at pH 7.4 (scan rate: 0.3 V/s).
